# Supplementary material for: Preparation of band-gap-grading Cu2ZnSn(S,Se)4 thin-film solar cells by post-sulfo-selenization treatment
Source: Royal Society of Chemistry journal article supplement (doi:10.1039/d2tc02685f), 2022-01-01
Supplement: d2tc02685f1.pdf [file d2tc02685f1.pdf]

## Supporting Information

### Preparation of band gap grading $\text{Cu}_2\text{ZnSn}(\text{S},\text{Se})_4$ thin film solar cells by the Post-Sulfo-Selenization treatment

Xiang Li, Xinghuan Hu, Hua Liao, Shuai Yang, Xinyu Li, Qiulian Li, Yonggang Zhao, Shurong Wang<sup>1</sup>

Key Laboratory of Rural Energy Engineering in Yunnan Province, Yunnan Normal University, Kunming 650500, PR China

In Supplementary Information, we have provided sample data without bandgap gradient after PSS treatment. It is used to illustrate the degree which the band gap grading effect can improve the performance of thin film solar cell. The sample is named PSS-ng.

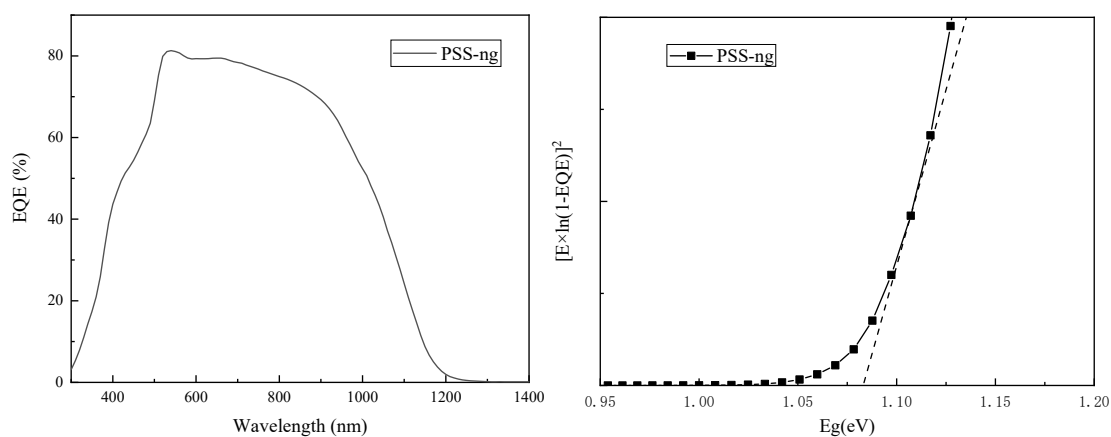

Fig.S1 (a)The EQE spectrum and (b) the band gap diagrams of the sample PSS-ng.

According to the EQE test, the  $E_g^{\text{EQE}}$  of sample PSS-ng is 1.083eV.

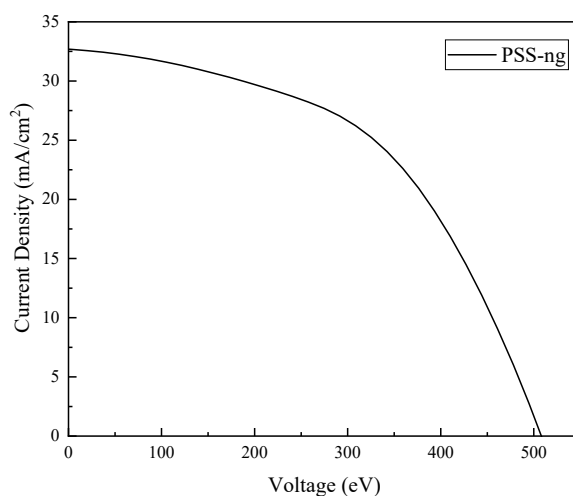

Fig.S2 The J-V characteristic of the sample PSS-ng.

<sup>1</sup> Corresponding author. E-mail address: shrw88@aliyun.com (S. Wang).

Table.S1 The parameters of the PSS-ng device.

| Sample | $V_{oc}$ (mV) | $J_{sc}$ (mA/cm <sup>2</sup> ) | FF (%) | PCE (%) | $R_s$ ( $\Omega \cdot \text{cm}^2$ ) | $R_{sh}$ ( $\Omega \cdot \text{cm}^2$ ) |
|--------|---------------|--------------------------------|--------|---------|--------------------------------------|-----------------------------------------|
| PSS-ng | 507.75        | 32.68                          | 49.59  | 8.23    | 3.85                                 | 103.5                                   |

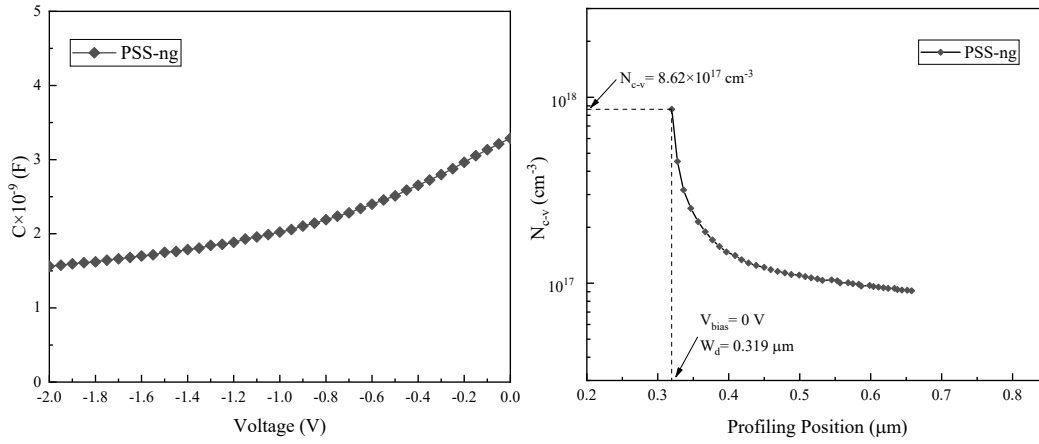

Fig.S3 The C-V and  $N_{c-v}$  curves of the sample PSS-ng. These data were taken under a 0 to -2 V reverse bias at 300 K.
